# Supplementary material for: Natural marine bromoform emissions in the fully coupled ocean–atmosphere model NorESM2
Source: Copernicus journal article supplement (doi:10.5194/esd-15-801-2024), 2024-06-21
Supplement: Supplementary file 1 [file esd-15-801-2024-supplement.pdf]

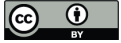

*Supplement of*

## **Natural marine bromoform emissions in the fully coupled ocean–atmosphere model NorESM2**

**Dennis Booge et al.**

*Correspondence to:* Dennis Booge (dbooge@geomar.de) and Kirstin Krüger (kkrueger@geo.uio.no)

The copyright of individual parts of the supplement might differ from the article licence.

1 **Contents of this file**

2 Multilinear regression equations (S1-S3)

3 Figures S1 to S4

4 Table S1

5

6

7

8

9 Equations for MLR calculations were as follows with coefficients *a*, *b*, *c*, *d*, *e*, *f*, CHBr<sub>3</sub> production (*Bromo<sub>prod</sub>*),  
10 *Bromo<sub>oce</sub>*, *Bromo<sub>air</sub>* and *Bromo<sub>flux</sub>*, as well as the 10 m surface wind speed (*wind*) and sea surface temperature (*SST*):

$$Bromo_{oce} = a * SST + b * wind + c * Bromo_{prod} + d * Bromo_{flux} + e * Bromo_{air} + f \quad (S1)$$

11

$$Bromo_{flux} = a * SST + b * wind + c * Bromo_{prod} + d * Bromo_{oce} + e * Bromo_{air} + f \quad (S2)$$

12

$$Bromo_{air} = a * SST + b * wind + c * Bromo_{prod} + d * Bromo_{flux} + e * Bromo_{oce} + f \quad (S3)$$

13

14

15

16

17

18

19

20

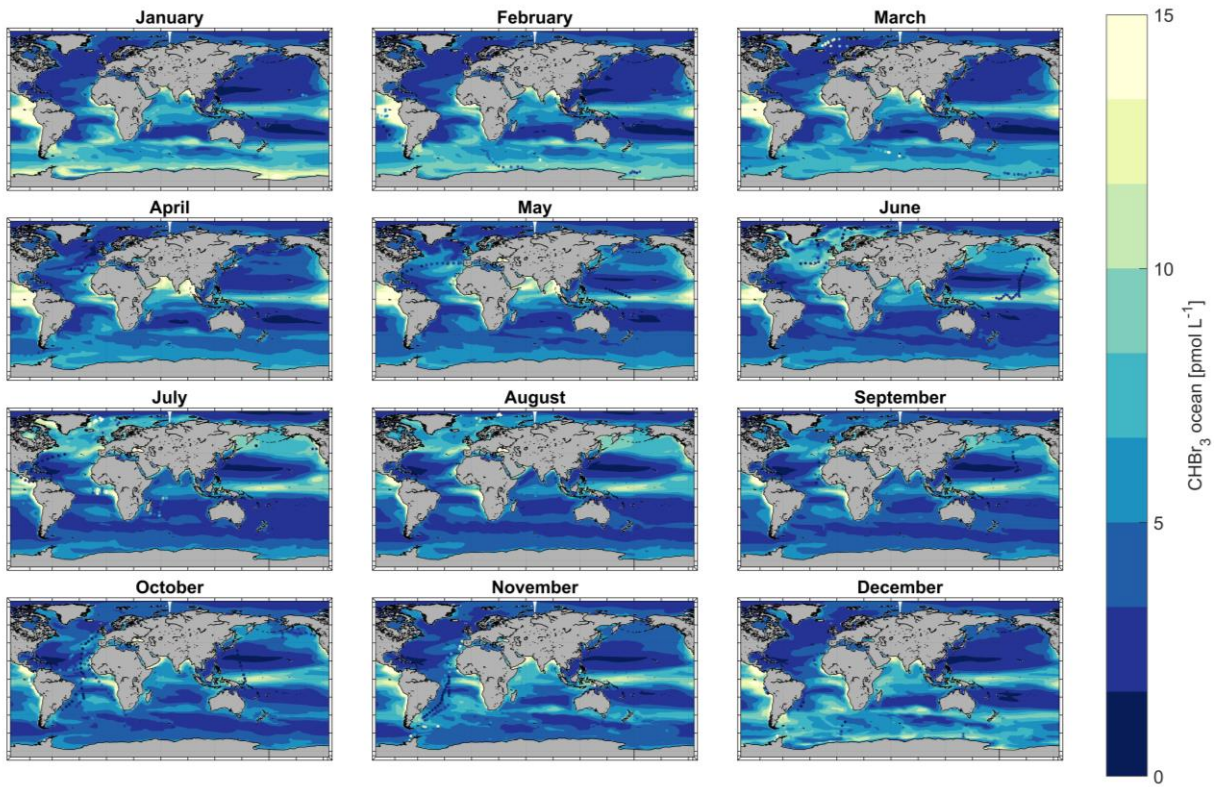

21 **Figure S1: Monthly resolved daily mean oceanic bromoform concentrations from HalOcat on top of**  
 22 **monthly mean oceanic bromoform data (1990-2014) from NorESM2.**

23  
 24  
 25

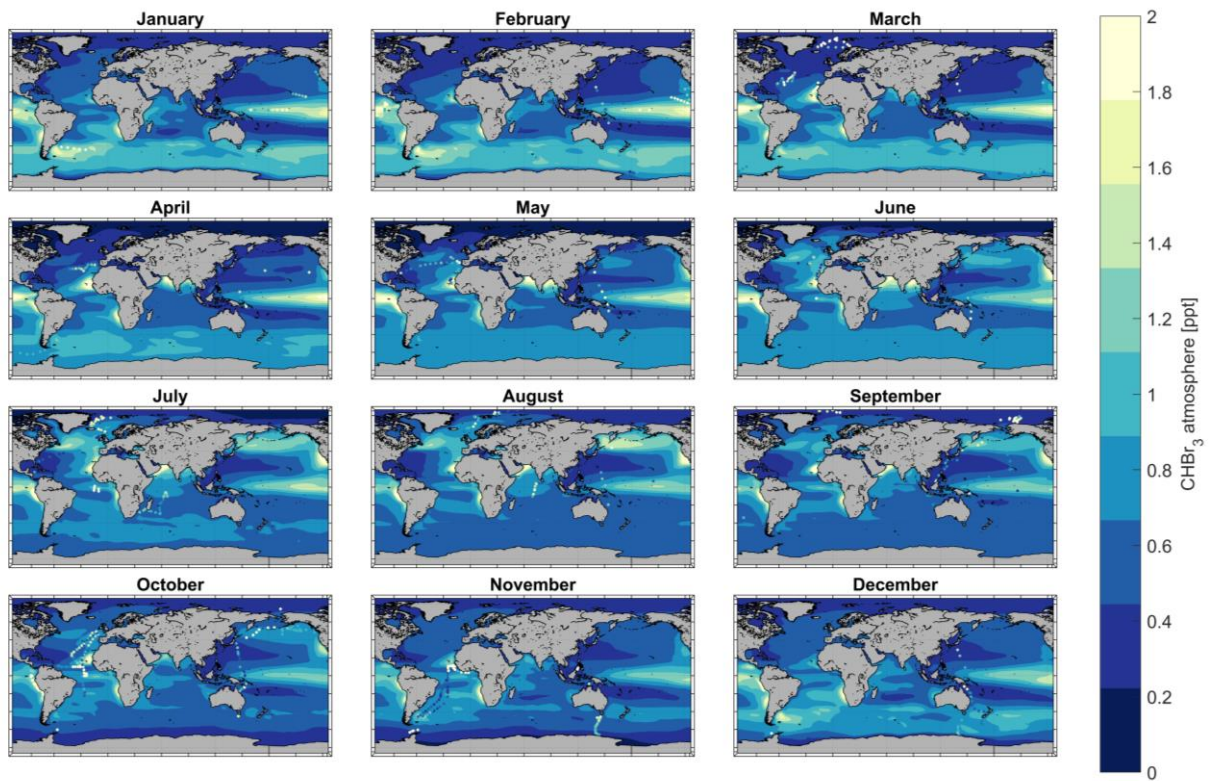

26 **Figure S2: Monthly resolved daily mean atmospheric bromoform mixing ratios from HalOcat on top of**  
 27 **monthly mean atmospheric bromoform data (1990-2014) from NorESM2.**

28  
 29



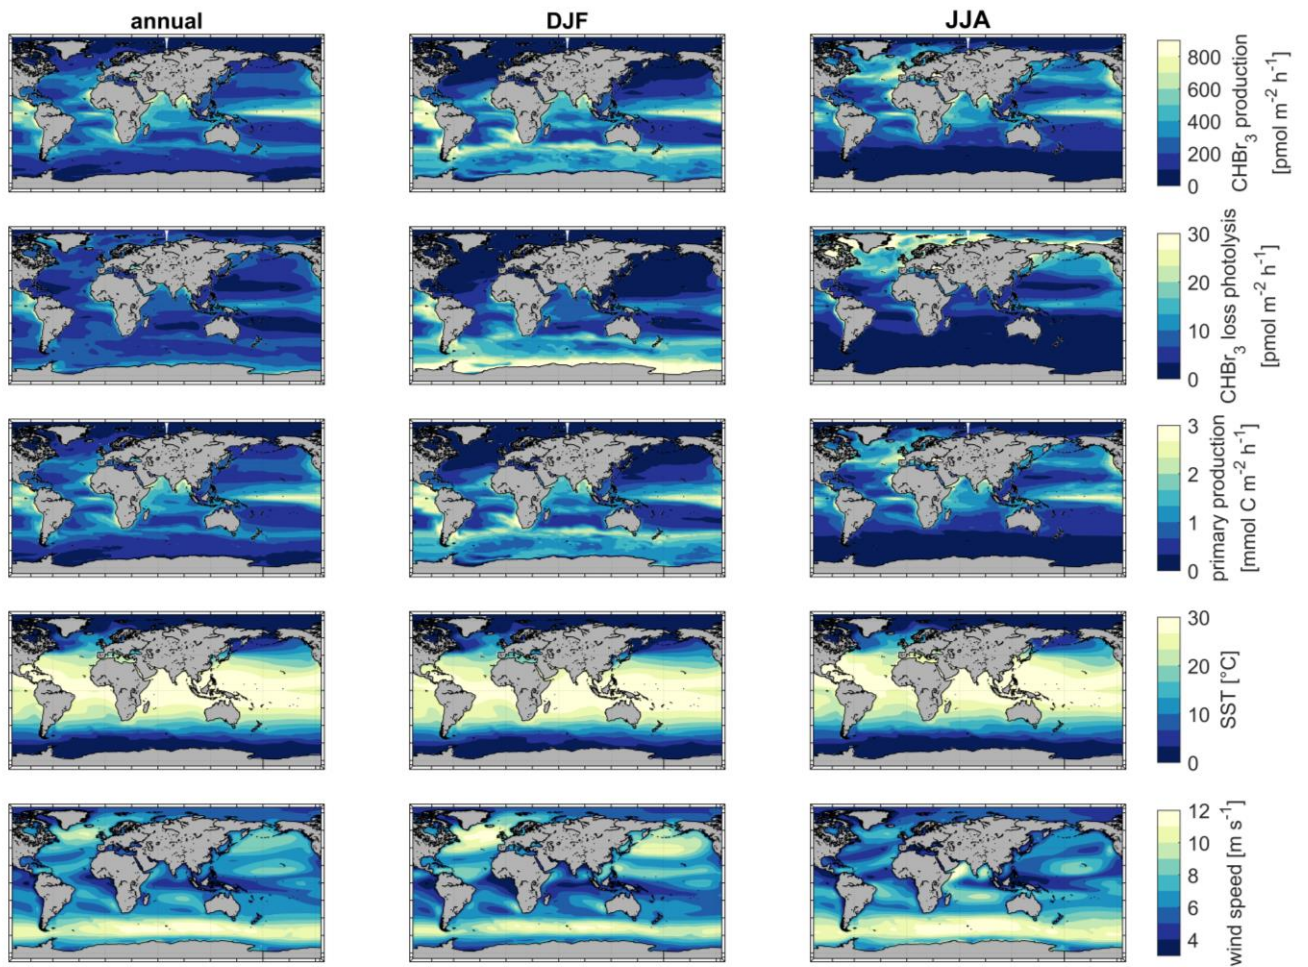

30 **Figure S3: Annual (left), DJF (middle) and JJA (right) mean oceanic surface integrated bromoform**  
 31 **production rates (upper panel), bromoform loss rates due to photolysis (second upper panel), integrated**  
 32 **primary production (middle panel), SST (second lower panel) and wind speed (lower panel) from NorESM2.**

33  
 34  
 35  
 36  
 37  
 38  
 39  
 40  
 41  
 42  
 43  
 44  
 45  
 46  
 47  
 48  
 49

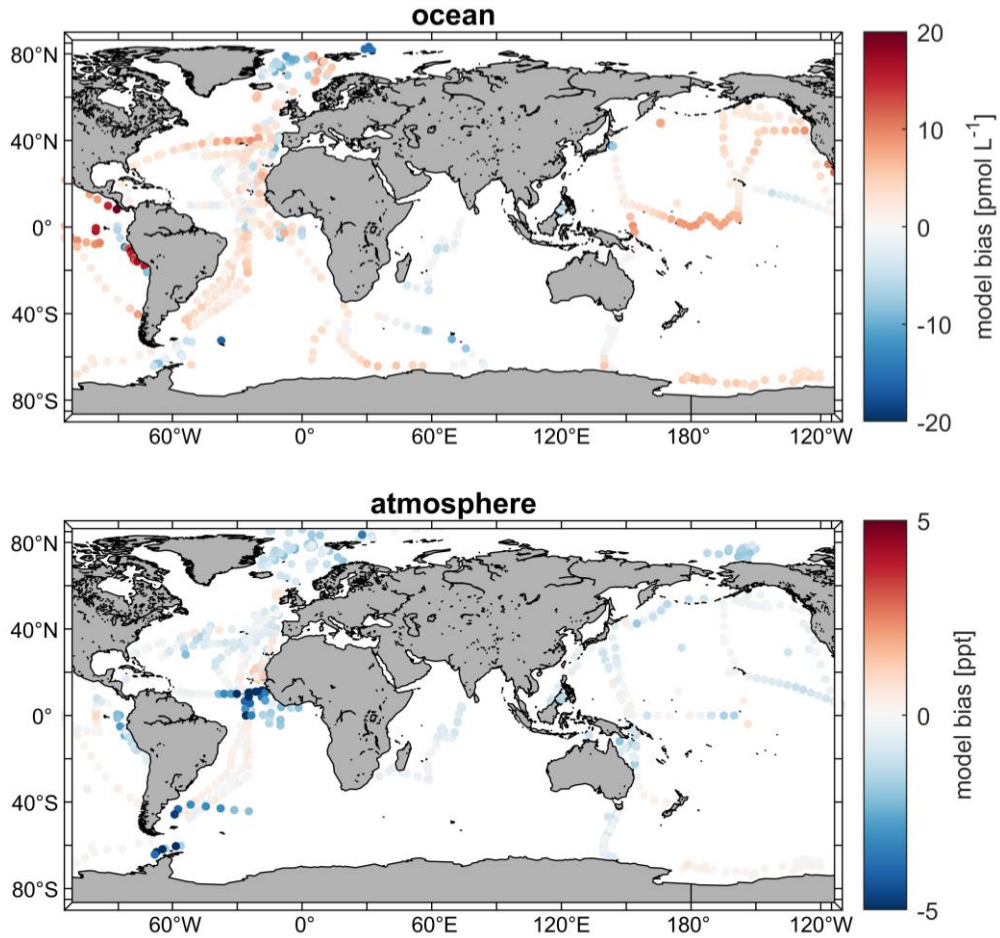

50 **Figure S4: Bromoform model bias of oceanic (upper panel) and atmospheric (lower panel) data used during**  
 51 **this study. Red colours show a bias towards positive values (overestimation of modelled results compared**  
 52 **to observations). Blue colours show a bias towards negative values (underestimation of modelled results**  
 53 **compared to observations).**

54  
 55  
 56  
 57  
 58  
 59  
 60  
 61  
 62  
 63  
 64  
 65  
 66  
 67  
 68

69 **Table S1: Annual and seasonal coefficients of the main predictors (driving factor) for each MLR in the**  
70 **different case studies. If the highest coefficient was not significantly different to the second or third highest**  
71 **coefficient, more than one coefficient including the respective parameters are listed. Atm: atmospheric**  
72 **mixing ratio, Prod: bromoform production, Ocean: ocean concentration, SST: sea surface temperature,**  
73 **WS: wind speed.**

|                                                  | Season | North Atlantic  |                    | Tropical West Pacific |              | Southern Ocean |             |
|--------------------------------------------------|--------|-----------------|--------------------|-----------------------|--------------|----------------|-------------|
|                                                  |        | Parameter       | Coefficient        | Parameter             | Coefficient  | Parameter      | Coefficient |
| CHBr <sub>3</sub><br>ocean<br>concentration      | Annual | Atm             | 0.68               | WS                    | -0.96        | Atm            | 0.60        |
|                                                  | DJF    | Atm             | 0.98               | WS                    | -0.95        | Atm            | 0.80        |
|                                                  | MAM    | Prod   Atm      | 0.64   0.41        | WS                    | -0.92        | Prod           | 0.82        |
|                                                  | JJA    | Atm   Prod      | 1.15   0.86        | Atm   Prod            | -0.58   0.49 | Atm            | 1.26        |
|                                                  | SON    | Prod            | 0.72               | Prod                  | 0.85         | SST            | -0.75       |
| CHBr <sub>3</sub><br>atmospheric<br>mixing ratio | Annual | Ocean           | 0.93               | WS                    | 0.94         | Ocean          | 1.07        |
|                                                  | DJF    | SST             | 1.01               | WS                    | 0.93         | Ocean          | 1.00        |
|                                                  | MAM    | Ocean           | 1.33               | WS                    | 0.92         | SST            | 0.92        |
|                                                  | JJA    | SST   Ocean     | 0.59   0.53        | WS   Ocean            | 0.51   0.42  | SST            | 0.67        |
|                                                  | SON    | Ocean           | 0.79               | WS                    | 0.77         | Ocean          | 1.62        |
| CHBr <sub>3</sub><br>fluxes                      | Annual | Ocean           | 0.83               | WS                    | 1.27         | Atm            | -1.22       |
|                                                  | DJF    | SST   Atm       | 2.05   -1.26       | WS                    | 1.55         | SST            | 1.16        |
|                                                  | MAM    | Prod   SST   WS | 0.79   0.67   0.63 | WS                    | 1.31         | Ocean          | 0.59        |
|                                                  | JJA    | WS   Ocean      | 0.60   0.60        | WS   SST              | 0.68   0.52  | Atm            | -0.88       |
|                                                  | SON    | SST             | 0.81               | WS                    | 1.11         | Atm            | -1.00       |

74
